# Supplementary material for: miRNA-148a Enhances the Treatment Response of Patients with Rectal Cancer to Chemoradiation and Promotes Apoptosis by Directly Targeting c-Met
Source: MDPI journal article supplement (doi:10.3390/biomedicines9101371), 2021-10-01
Supplement: s1 [file s1]

**Supplementary Table S1.** The microRNA microarray data. We found that 22 miRNAs differentially expressed between pCR tissues and non-pCR tissues (All  $P < 0.05$ ); 14 miRNAs were upregulated in the pCR group and 6 miRNAs were downregulated in the pCR group.\*downregulated miRNAs.

| Candidates   | Fold change | P value | Candidates    | Fold change | P value |
|--------------|-------------|---------|---------------|-------------|---------|
| hsa-miR-1    | 3.88        | 0.031   | hsa-miR-122   | 1.93        | 0.038   |
| hsa-miR-135a | 3.52        | 0.022   | hsa-miR-382   | 2.66        | 0.014   |
| hsa-miR-206  | 6.78        | 0.007   | hsa-miR-3673  | 3.52        | 0.008   |
| hsa-miR-138  | 5.34        | 0.004   | hsa-miR-4710  | 4.98        | 0.004   |
| hsa-miR-29c  | 6.45        | 0.005   | *hsa-miR-192  | 2.15        | 0.029   |
| hsa-miR-205  | 2.18        | 0.033   | *hsa-miR-194  | 2.58        | 0.012   |
| hsa-miR-323a | 3.79        | 0.005   | *hsa-miR-215  | 4.98        | 0.002   |
| hsa-miR-148a | 7.17        | 0.003   | *hsa-miR-601  | 2.06        | 0.026   |
| hsa-miR-93   | 2.98        | 0.016   | *hsa-miR-3195 | 2.31        | 0.028   |
| hsa-miR-645  | 3.11        | 0.029   | *hsa-miR-3187 | 1.56        | 0.031   |

**Supplementary Figure S1**

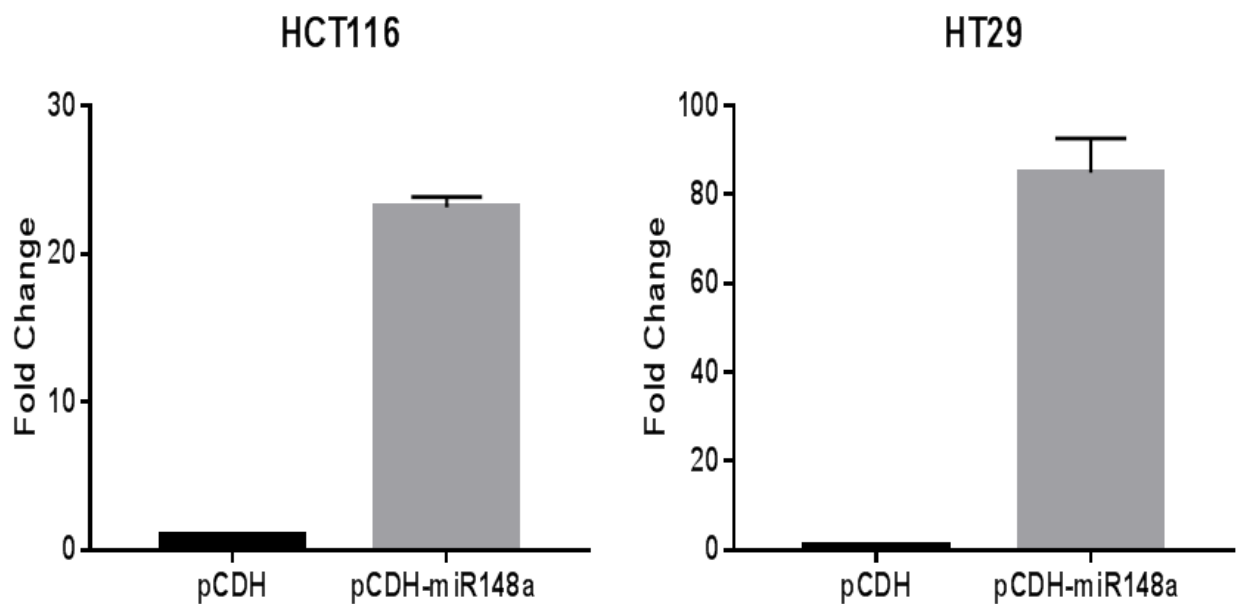

**Supplementary Figure S1.** Cell lines transfection. Either pCDH-miRNA-148a vector or a negative scrambled pCDH vector was transfected into HT29 and HCT116 cells, and miRNA-148a expression was confirmed using RT-qPCR
